# Supplementary material
Source: publisher site journal article supplement (https://www.dovepress.com/article/496540)
Supplement: Supplementary file 1 [file Supplementary%20material.doc]

**Supplementary Table 1** Characteristics of genetic variations used as instrumental variables for obstructive sleep apnea

| **SNP** | **Beta** | **pval** | **SE** | **Effect allele** | **Other allele** | **EAF** | **F** |
| --- | --- | --- | --- | --- | --- | --- | --- |
| rs10507084 | 0.0567724 | 1.78E-09 | 0.00943575 | T | C | 0.179858 | 36.20109078 |
| rs10986727 | -0.0453519 | 1.22E-09 | 0.00746228 | G | A | 0.618738 | 36.93583245 |
| rs113955098 | -0.0832857 | 2.21E-08 | 0.0148862 | A | G | 0.0678894 | 31.30207887 |
| rs114106239 | -0.111631 | 2.14E-08 | 0.0199322 | T | C | 0.0371451 | 31.36600143 |
| rs11981973 | 0.0562613 | 1.60E-09 | 0.00932349 | G | A | 0.181693 | 36.41350693 |
| rs12167677 | -0.041001 | 4.19E-08 | 0.00747819 | G | C | 0.390834 | 30.06047979 |
| rs1228509 | 0.0436404 | 1.31E-08 | 0.00767691 | C | A | 0.656497 | 32.31502876 |
| rs143490656 | -0.100661 | 1.44E-08 | 0.0177573 | C | A | 0.0464214 | 32.13428323 |
| rs17202840 | -0.0597083 | 1.16E-09 | 0.00981184 | T | C | 0.167496 | 37.03126067 |
| rs1800437 | -0.0532732 | 1.84E-10 | 0.00835811 | C | G | 0.258304 | 40.62575118 |
| rs1885767 | -0.0430611 | 5.58E-09 | 0.00738761 | G | A | 0.593731 | 33.9752232 |
| rs28815269 | 0.045323 | 1.74E-09 | 0.00752819 | A | G | 0.616267 | 36.24567188 |
| rs557359 | 0.0471574 | 2.18E-08 | 0.00842588 | G | A | 0.746656 | 31.32341941 |
| rs59333125 | -0.0763694 | 1.73E-08 | 0.0135482 | C | A | 0.0810173 | 31.77426834 |
| rs61873510 | 0.0480822 | 1.44E-09 | 0.00794667 | T | G | 0.301164 | 36.6098799 |
| rs6955671 | -0.0431134 | 9.46E-09 | 0.00751087 | T | C | 0.627912 | 32.94913795 |
| rs76229479 | -0.0679571 | 4.04E-08 | 0.0123803 | C | A | 0.0986752 | 30.13056932 |
| rs7683676 | -0.0431153 | 4.16E-08 | 0.00786208 | G | C | 0.690966 | 30.07377231 |

SNP, single nucleotide polymorphism; Beta, beta exposure; SE, standard error; effect allele is the major obstructive sleep apnea -raising allele; EAF, effect allele frequency; The F-statistic for each SNP was calculated as follows: F = R2 × (N – k − 1) / [k × (1−R2)].
